# Supplementary figures and images for: Camphene-derived primary and hydroxymethyl phosphines
Source: Royal Society of Chemistry journal article supplement (doi:10.1039/b006252i), 2001-01-01

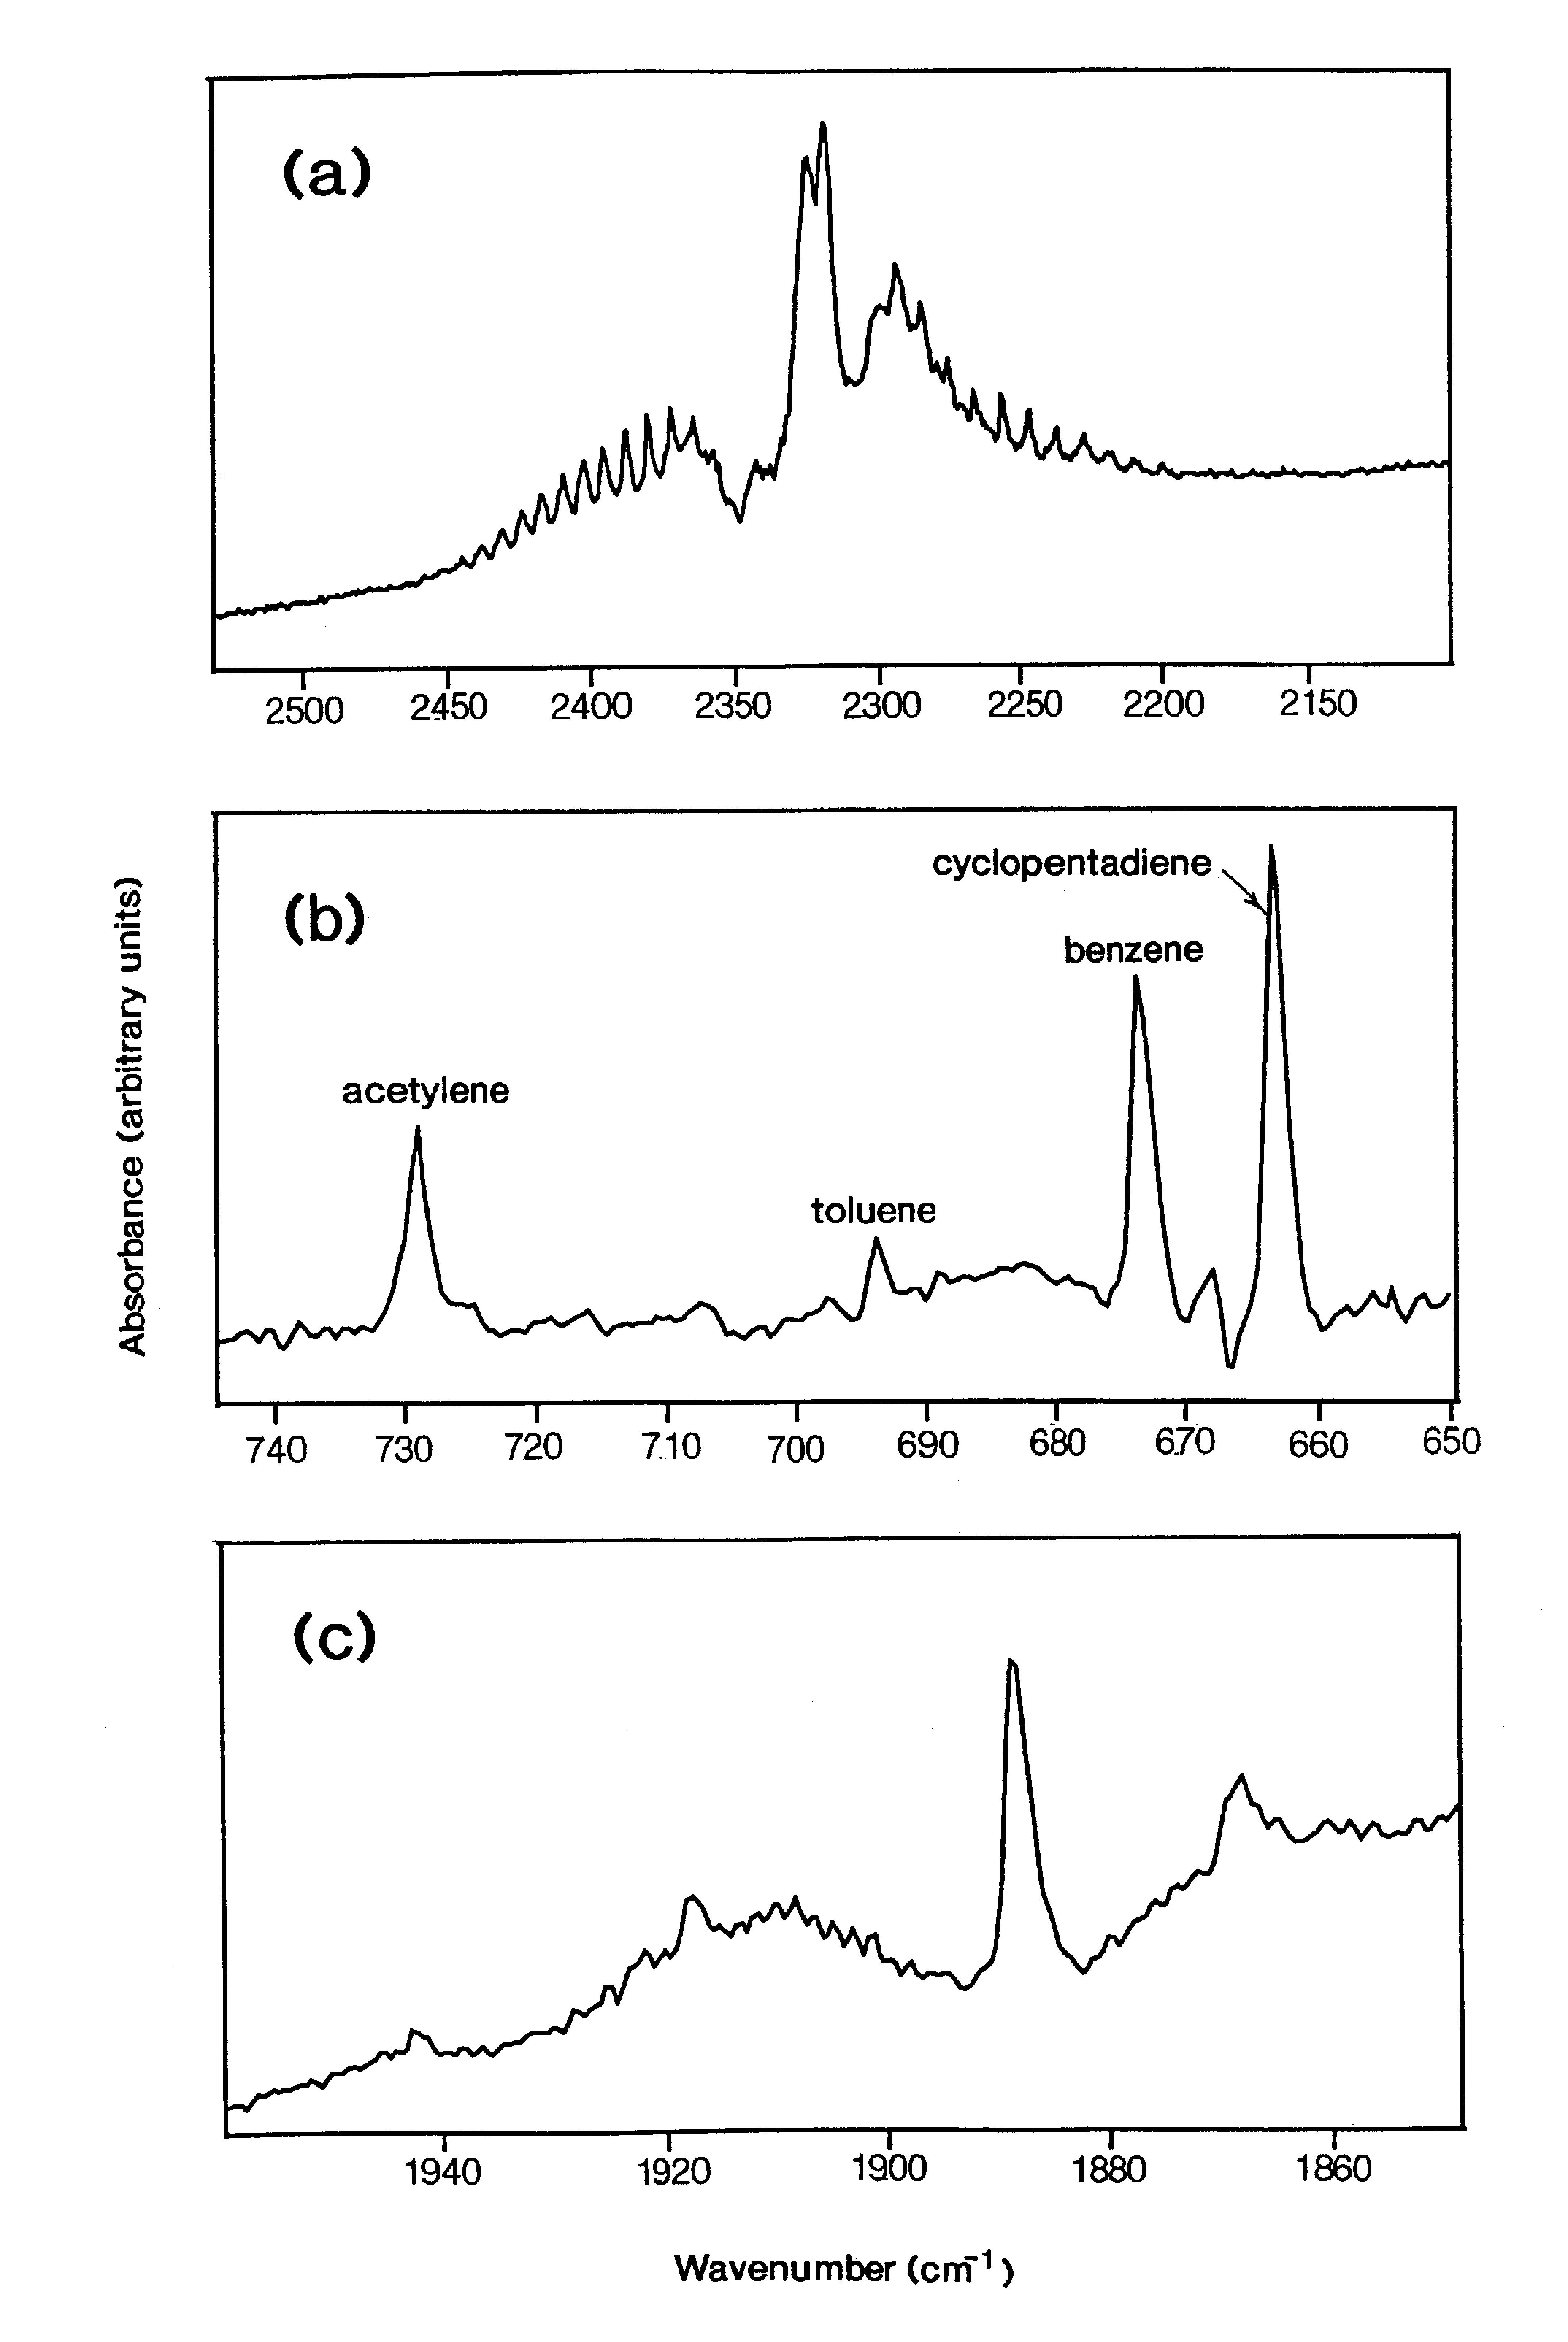


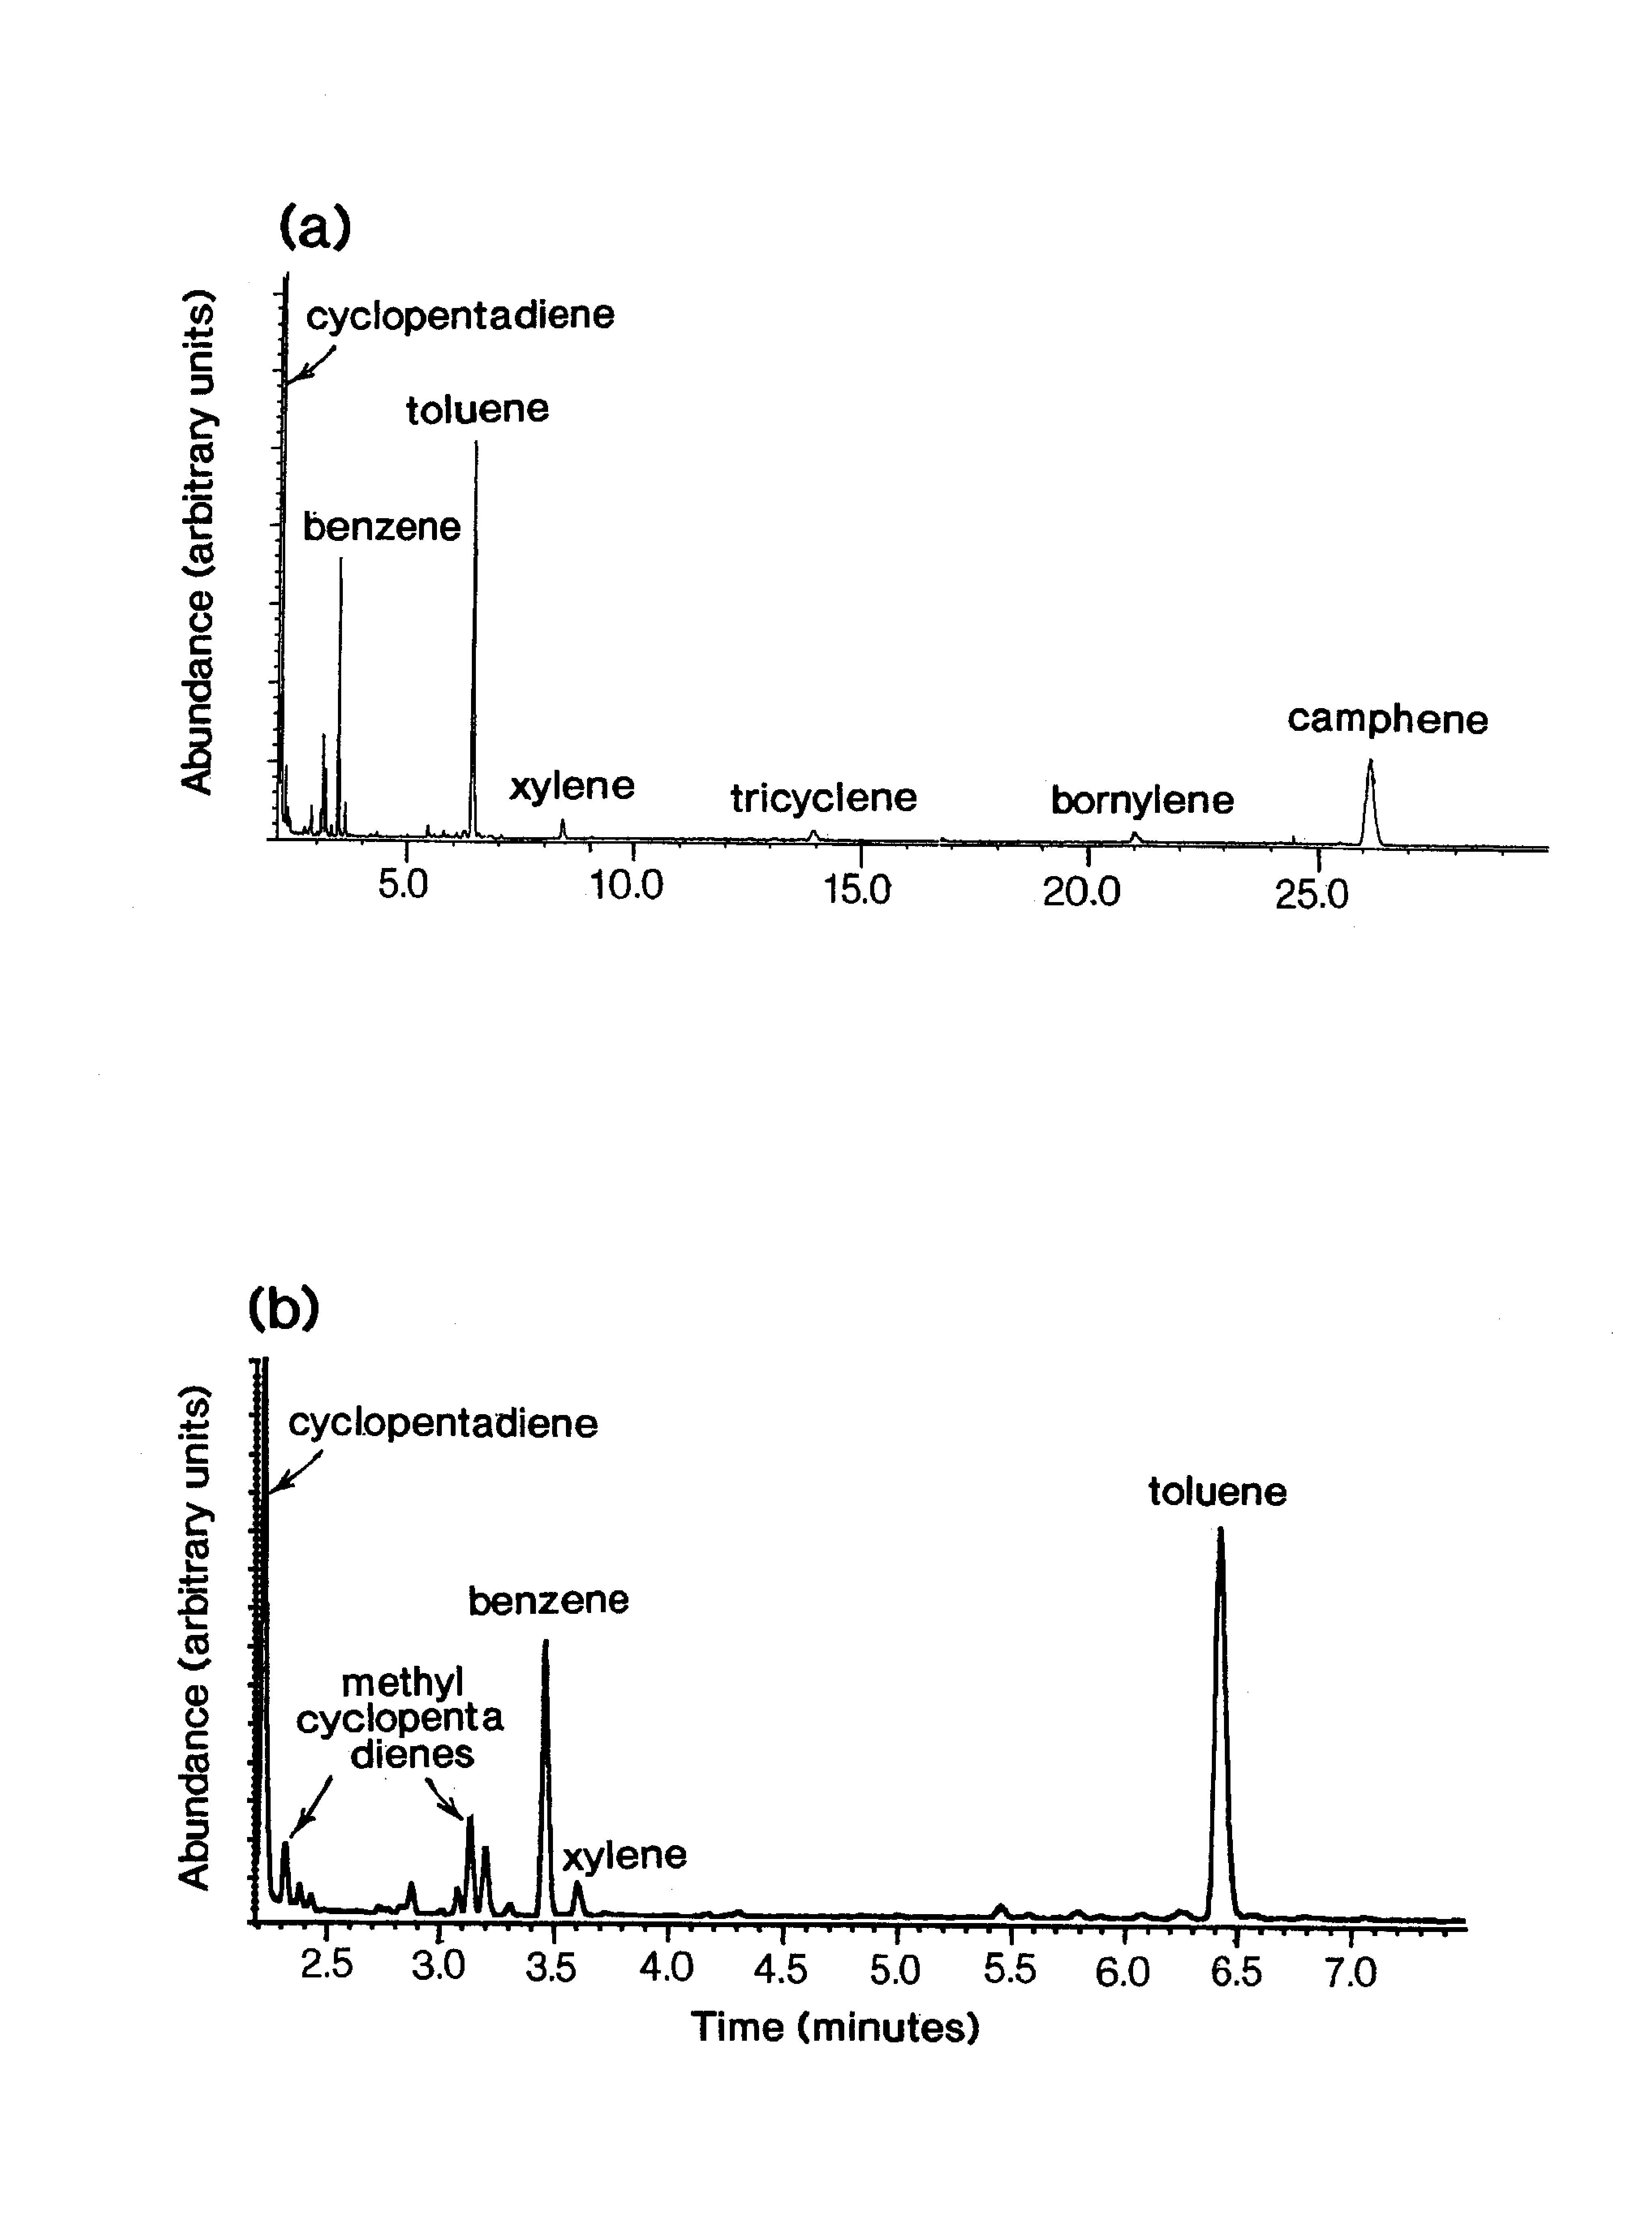

Supplement: b006252i.doc [file b006252i.doc]
